# Supplementary material
Source: Springer Nature journal article supplement (https://www.springermedizin.de/resource/supplementary/12906_2008_176_MOESM1_ESM.pdf/9524192)

### A. Patterns of CAM Use In BRCA+ Women by Individual CAM Therapy

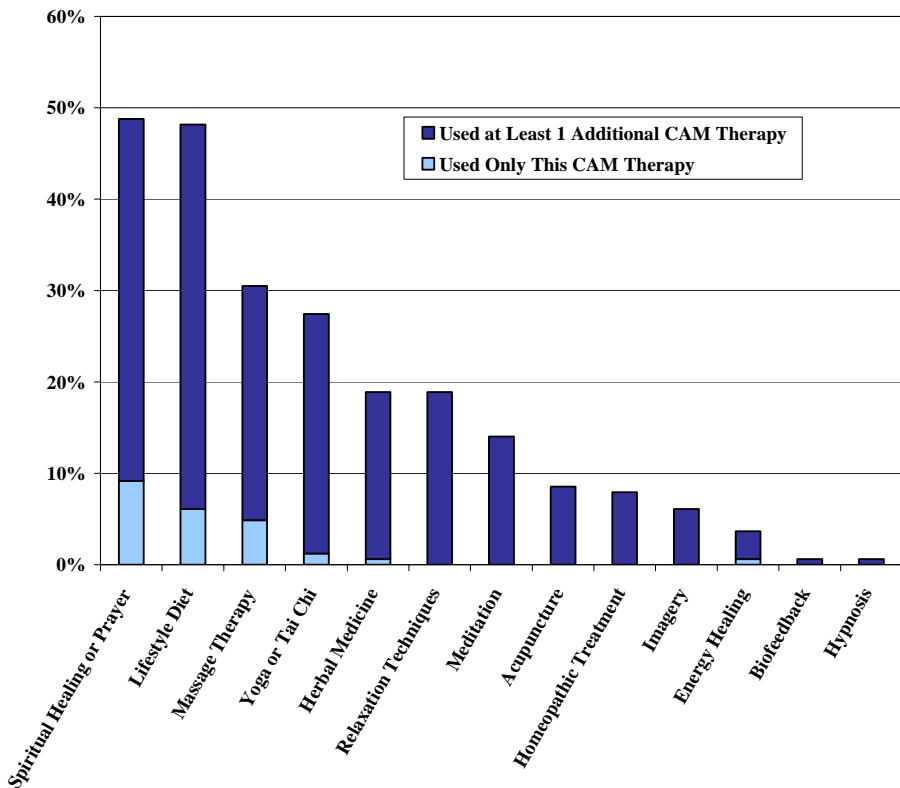

### B. CAM Use by Domain

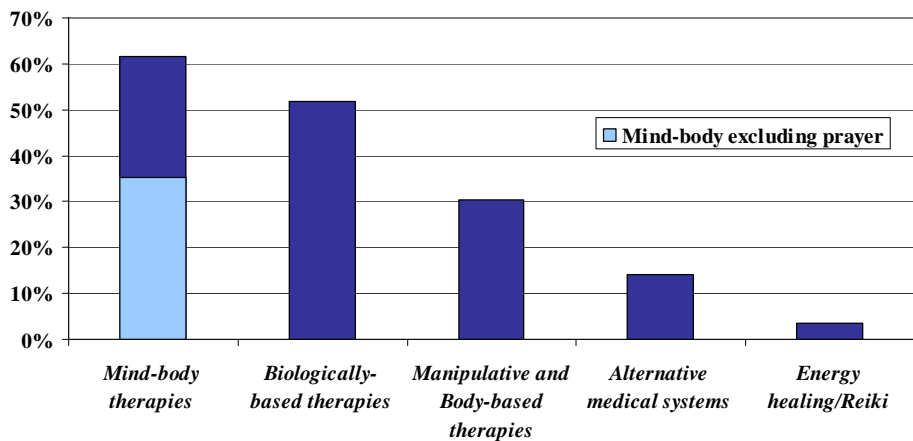

Supplement: MOESM1 [file 9524192]
